# Supplementary material for: Layer-modulated, wafer scale and continuous ultra-thin WS2 films grown by RF sputtering via post-deposition annealing
Source: Royal Society of Chemistry journal article supplement (doi:10.1039/c6tc01954d), 2016-01-01
Supplement: c6tc01954d1.pdf [file c6tc01954d1.pdf]

Electronic Supporting Information

## **Layer-modulated, wafer scale and continuous ultra-thin WS<sub>2</sub> films grown by RF sputtering via post deposition annealing**

Sajjad Hussain<sup>a,b</sup>, Muhammad Farooq Khan<sup>a,d</sup>, Muhammad Arslan shehzad<sup>a,b</sup>, Dhanasekaran Vikraman<sup>c</sup>, Muhammad Zahir Iqbal<sup>a,d</sup>, Dong-Chul Choi<sup>a,b</sup>, Wooseok Song<sup>e</sup>, Ki-Seok An<sup>e</sup>, Yongho Seo<sup>a,b</sup>, Jonghwa Eom, Wan-Gyu Lee<sup>\*f</sup>, and Jongwan Jung<sup>\* a,b</sup>

<sup>a</sup>Graphene Research Institute, Sejong University, Seoul 143-747, Republic of Korea.

<sup>b</sup>Institute of Nano and Advanced Materials Engineering, Sejong University, Seoul 143-747, Republic of Korea.

<sup>c</sup>Division of Energy Systems Research, Ajou University, Suwon 443-749, Republic of Korea.

<sup>d</sup>Department of Physics and Graphene Research Institute, Sejong University, Seoul 143-747, Republic of Korea.

<sup>e</sup>Thin Film Materials Research Group, Korea Research Institute of Chemical Technology, Daejeon 305-600, Korea

<sup>f</sup>National Nano Fab Center, Daejeon, Republic of Korea.

\*Corresponding authors E-mail: [jwjung@sejong.ac.kr](mailto:jwjung@sejong.ac.kr) (Prof. Jongwan Jung), [wangyulee@nnfc.re.kr](mailto:wangyulee@nnfc.re.kr) (Prof. Wan-Gyu Lee)

KEYWORDS: WS<sub>2</sub>, monolayer, RF sputtering, CVD, field effect transistor

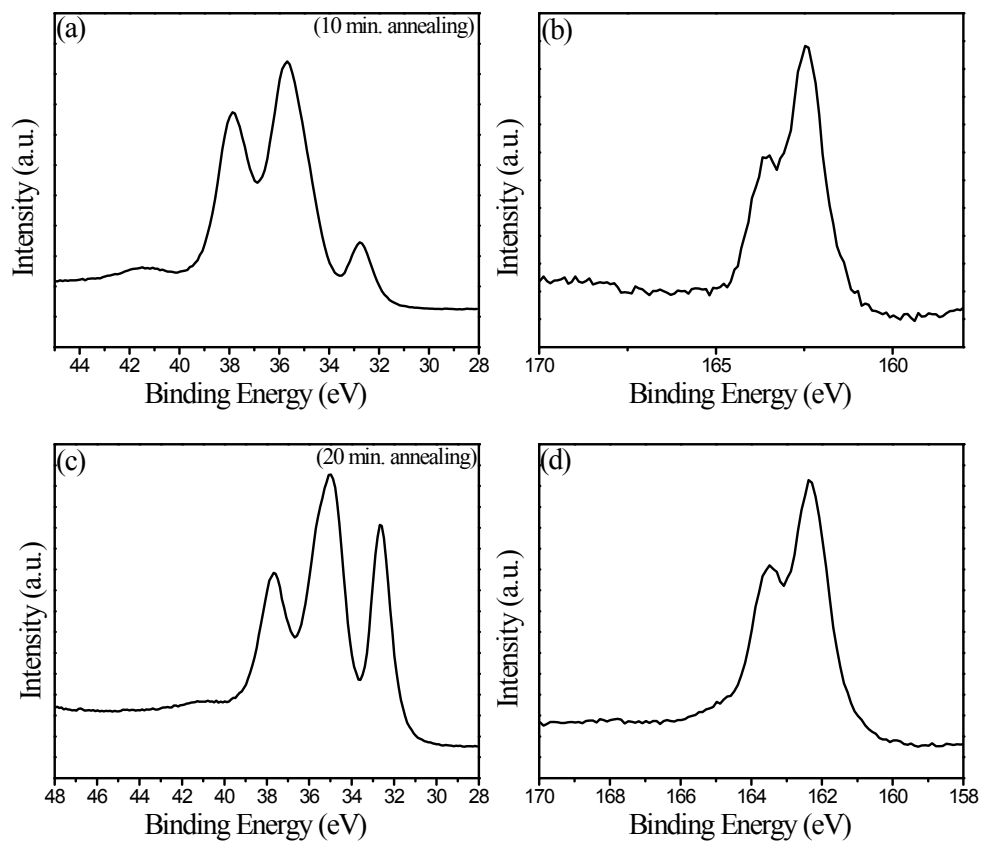

Figure S1 XPS spectra for W and S binding energy peaks of WS<sub>2</sub> films sulfurized at 10 and 20 minutes in sulfur and Ar environment at 650°C.

|               |              |              |
|---------------|--------------|--------------|
| <b>10 min</b> | <b>74.17</b> | <b>25.83</b> |
| <b>20 min</b> | <b>43.86</b> | <b>56.14</b> |
| <b>30 min</b> | <b>31.99</b> | <b>68.01</b> |

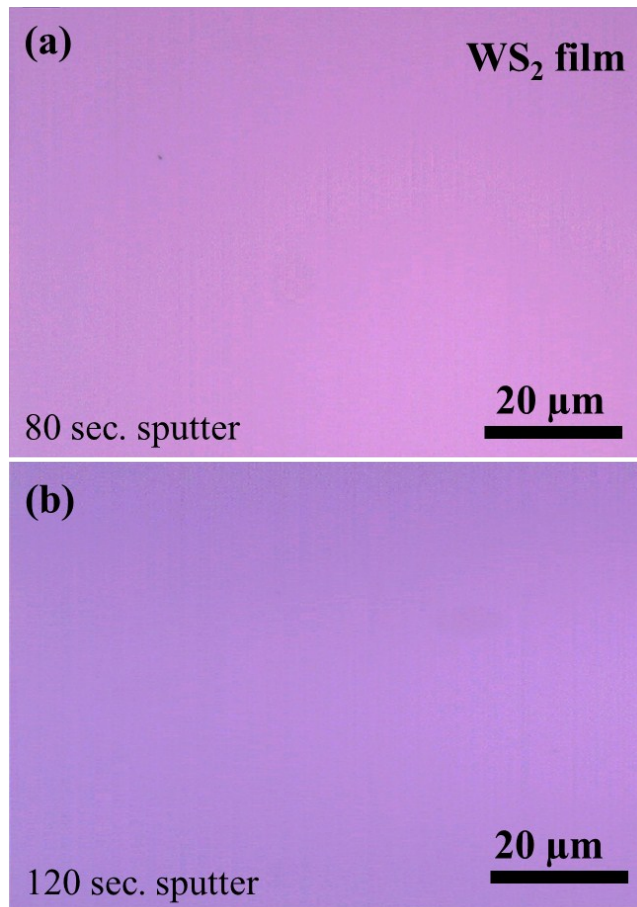

Figure S2. Low magnification optical images of WS<sub>2</sub> films deposited at RF sputtering time (a) 80 sec and (b) 120 sec.

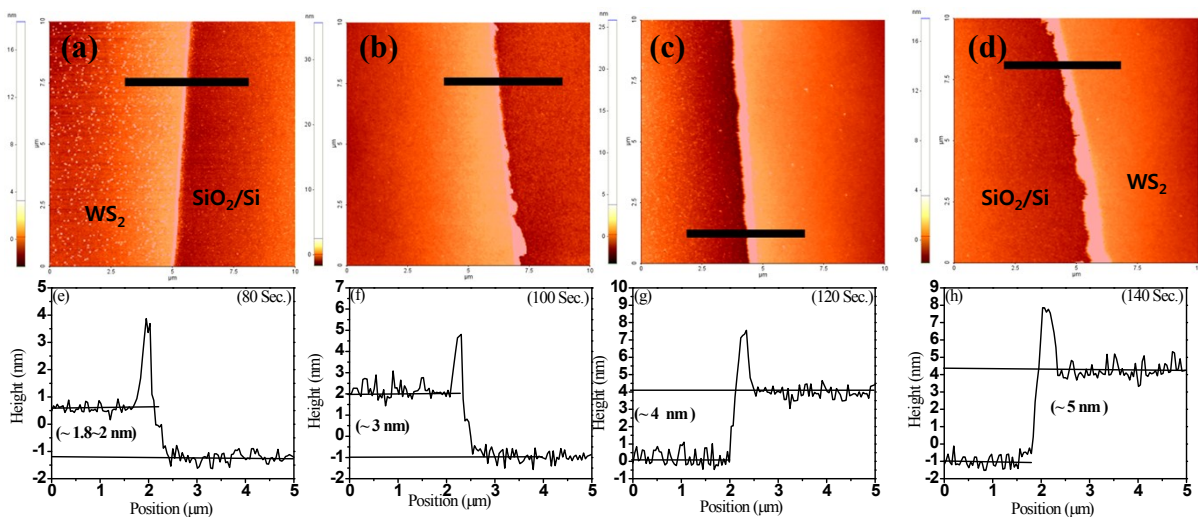

Figure S3 (a-d) AFM topographical images of WS<sub>2</sub> films prepared at different sputtering time such as 80, 100, 120 and 140 sec (few-layer); (e-h) step height profile variations of the corresponding WS<sub>2</sub> films.

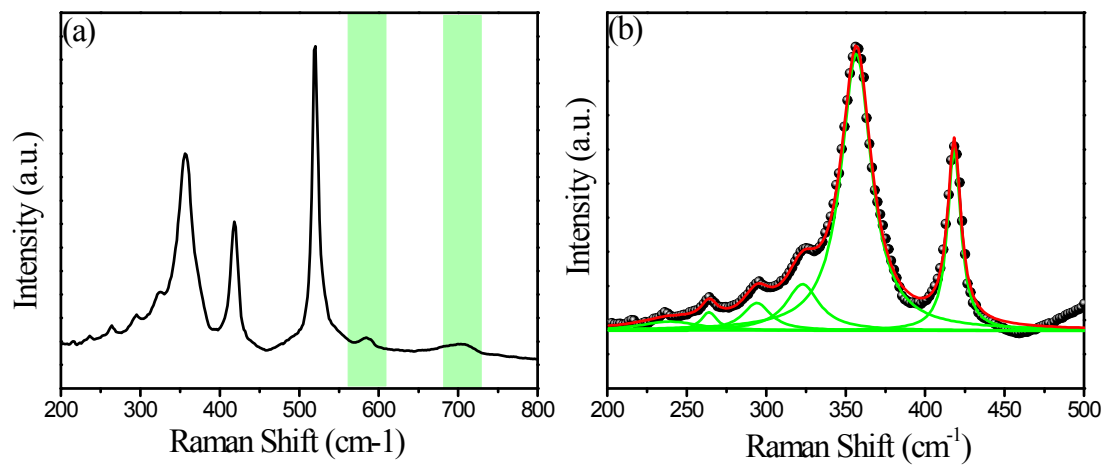

Figure S4 (a) Raman spectrum of WS<sub>2</sub> (80 sec-sputter) at room temperature; (b) Magnified spectra of fifteen Raman modes.

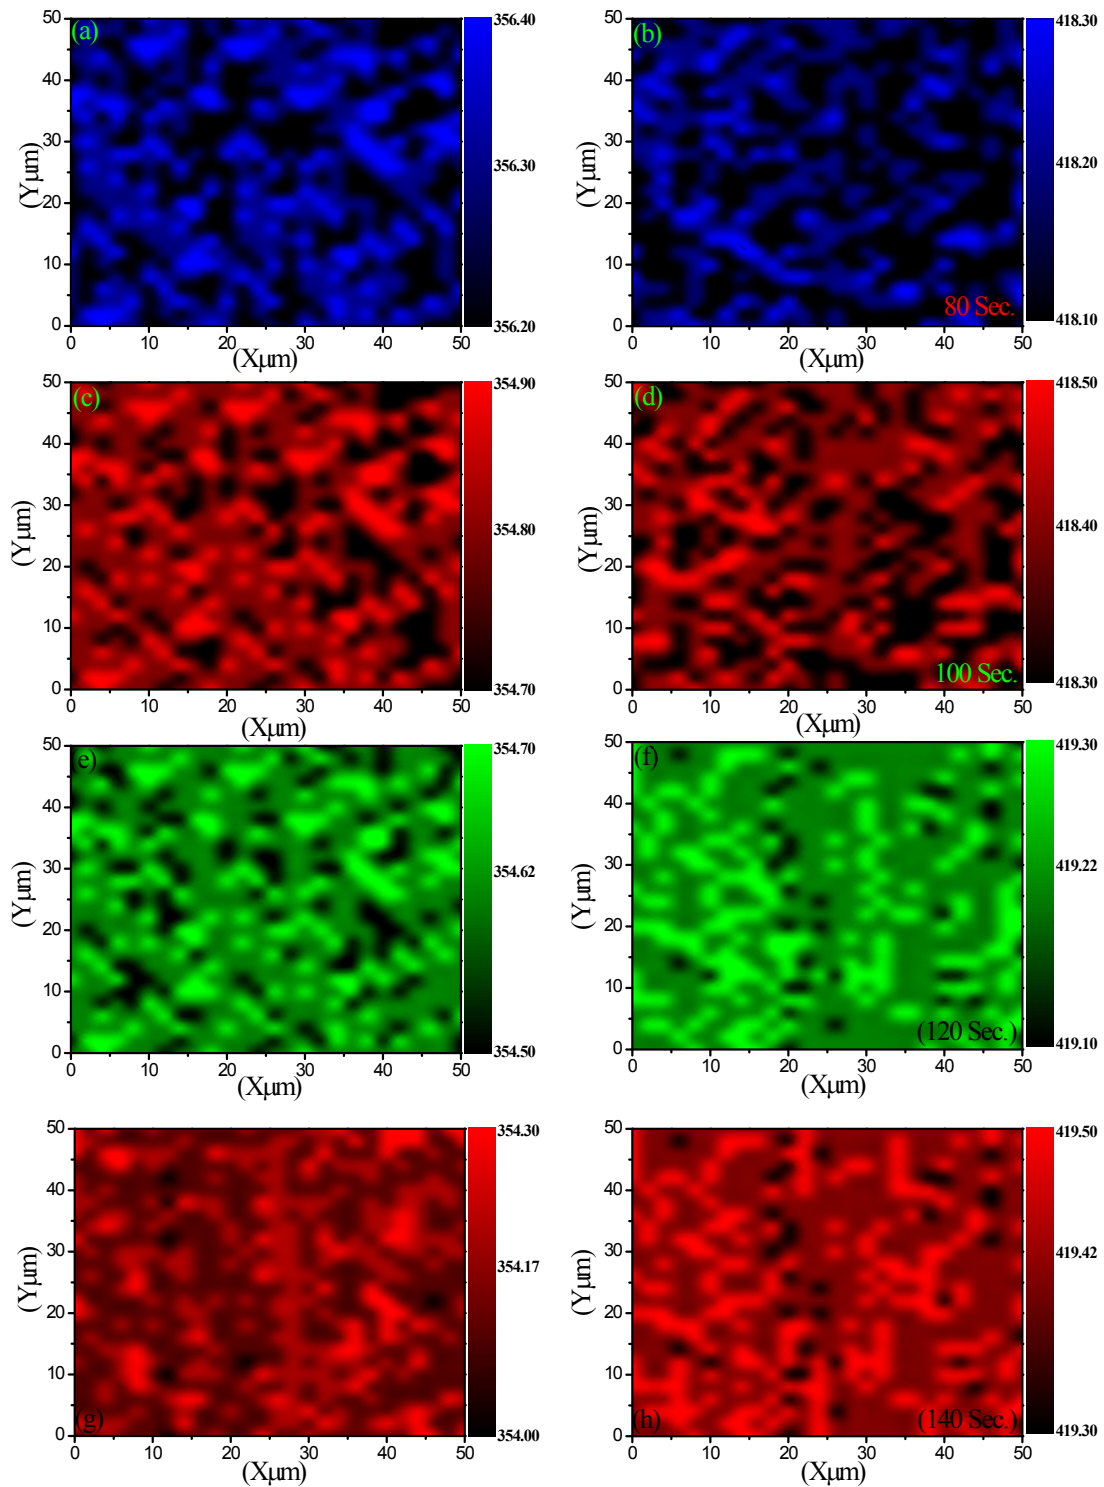

**Figure S5.** Raman mapping of  $E_{12g}$  and  $A_{1g}$  peak  $E_{12g}$  and  $A_{1g}$  peak (a,b) 80 sec (c,d) 100 sec. (e,f) 120sec, (g,h) 140 sec-sample

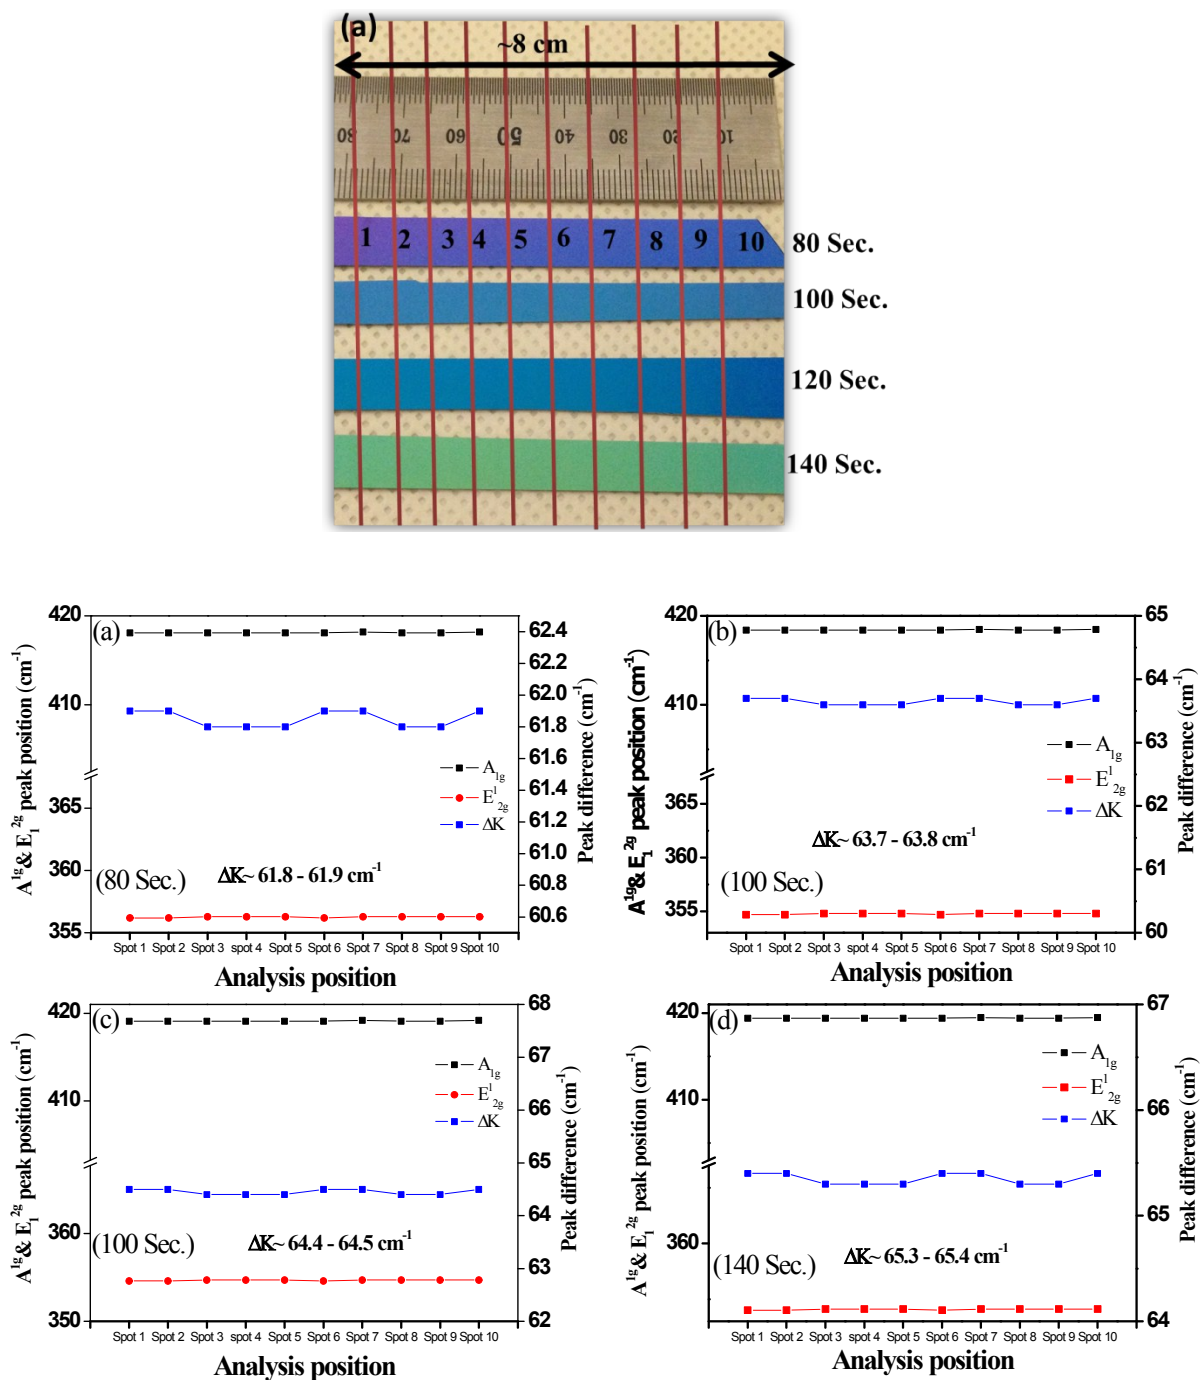

**Figure S6** (a) Large-area (approximately 8 cm) 80, 100, 120, and 140 sec-sample, (b-e) relative Raman peak position of  $E_{12g}^1$  and  $A_{1g}$  bands and the peak differences ( $\Delta K$ ) plotted as a function of numbered spot at ten measurement points.

**Table S2** Statistical analysis of Raman mapping

|                                            |                    | <b>80 Sec.</b> | <b>100 Sec.</b> | <b>120 Sec.</b> | <b>140 Sec.</b> |
|--------------------------------------------|--------------------|----------------|-----------------|-----------------|-----------------|
| <b>E<sub>2g</sub><sup>1</sup><br/>mode</b> | Average            | 356.285        | 354.8055        | 354.6032        | 354.1364        |
|                                            | Max.               | 356.4          | 354.9           | 354.7           | 354.3           |
|                                            | Min.               | 356.2          | 354.7           | 354.5           | 354             |
|                                            | Standard deviation | 0.074613       | 0.060167        | 0.062914        | 0.06441         |
| <b>A<sub>1g</sub><br/>mode</b>             | Average            | 418.17         | 418.3905        | 419.2328        | 419.4316        |
|                                            | Max.               | 418.3          | 418.5           | 419.3           | 419.5           |
|                                            | Min.               | 418.1          | 418.3           | 419.1           | 419.3           |
|                                            | Standard deviation | 0.072147       | 0.072299        | 0.051088        | 0.050672        |
| <b>Δ k</b>                                 | Average            | 61.8852        | 63.5852         | 64.6304         | 65.282          |
|                                            | Max.               | 62             | 63.8            | 64.8            | 65.4            |
|                                            | Min.               | 61.7           | 63.4            | 64.5            | 65.1            |
|                                            | Standard deviation | 0.082024       | 0.087702        | 0.079883        | 0.085705        |



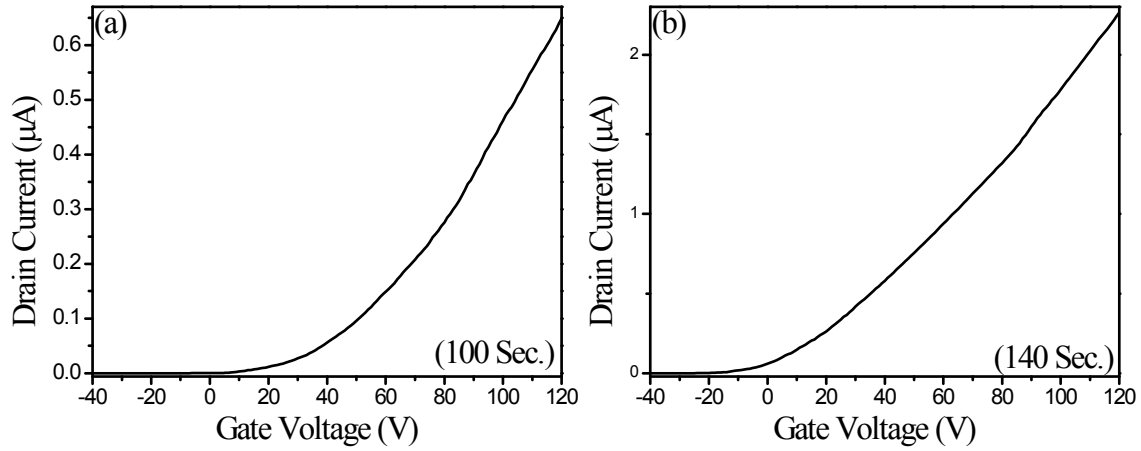

**Figure S7.** Linear  $I_{ds}$ - $V_{bg}$  based FETs ( $V_d = 1V$ ) of WS<sub>2</sub> (100 Sec. sputter) and (140 Sec. sputter) films. The extracted transconductances values of 100 and 140 Sec. sputter samples are  $9.35 \times 10^{-9}$  S and  $2.26 \times 10^{-8}$  S, respectively.

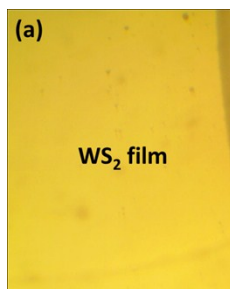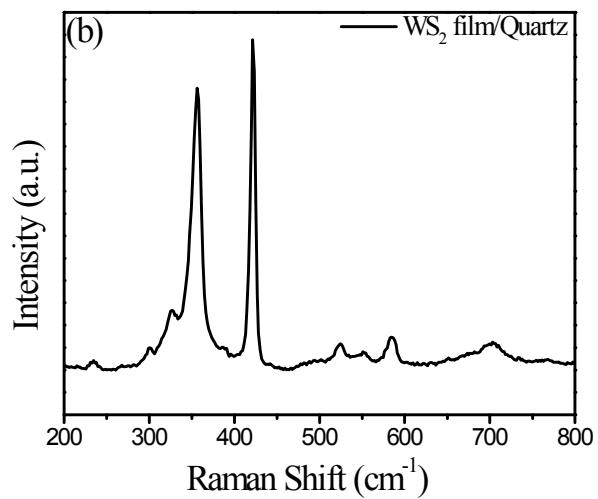

**Figure S8** (a) optical image of WS<sub>2</sub> film on quartz substrate. (b) Raman spectrum for few layer WS<sub>2</sub> film. E<sub>2g</sub><sup>1</sup> is at ~355.5 cm<sup>-1</sup> and A<sub>1g</sub> at ~421.7 cm<sup>-1</sup>.
